# Supplementary material for: Dual channel selective fluorescence detection of Al(iii) and PPi in aqueous media with an ‘off–on–off’ switch which mimics molecular logic gates (INHIBIT and EXOR gates)
Source: Royal Society of Chemistry journal article supplement (doi:10.1039/c3dt50621e), 2013-01-01
Supplement: c3dt50621e.pdf [file c3dt50621e.pdf]

## **Supporting Information**

### **Dual channel selective fluorescence detection of Al(III) and PPI in aqueous media with ‘off-on-off’ switch which mimics Molecular logic gating (INHIBIT and EXOR gate) Interpretations**

**Shyamaprosad Goswami\*, Abhishek Manna, Sima Paul, Krishnendu Aich, Avijit K. Das and Shampa Chakroborty**

Department of Chemistry, Bengal Engineering and Science University, Shibpur, Howrah 711103, West Bengal, India E-mail: [spgoswamical@yahoo.com](mailto:spgoswamical@yahoo.com); Fax: +91-3326682916.

## **CONTENTS**

|                                                                       |       |
|-----------------------------------------------------------------------|-------|
| 1. Job plot.....                                                      | 2     |
| 2. Effect of pH.....                                                  | 2     |
| 3. Determination of fluorescence quantum yield.....                   | 2     |
| 4. Determination of association constant .....                        | 3-4   |
| 5. Calculation of the detection limit.....                            | 4-5   |
| 6. <sup>1</sup> H-NMR, <sup>13</sup> C-NMR and Mass spectra.....      | 6-11  |
| 7. Cyclic Voltammogram of ISH with addition of Al(III) and PPI.....   | 11    |
| 8. Fluorescence spectra of receptor with different guest cations..... | 12-15 |
| 9. Fluorescence spectra of receptor with different guest anions.....  | 15-17 |
| 10. UV-vis titration spectra.....                                     | 17    |
| 11. Comparative IR spectra of receptor and Al-complex .....           | 18    |
| 12. References.....                                                   | 18    |

### 1. Job Plot by fluorescence method:

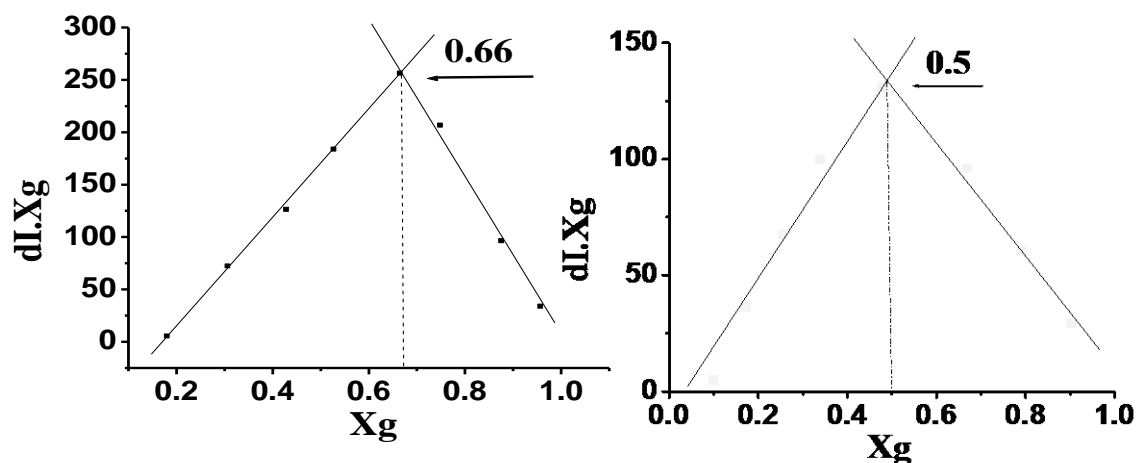

**Figure S1:** Job plot diagram of receptor i.e. ISH with  $Al^{3+}$  (left) and PPI (right) (where  $X_g$  is the mole fraction of the  $Al^{3+}$  and PPI respectively and  $dI$  indicates the change of Fl.Intensity).

### 2. Effect of pH:

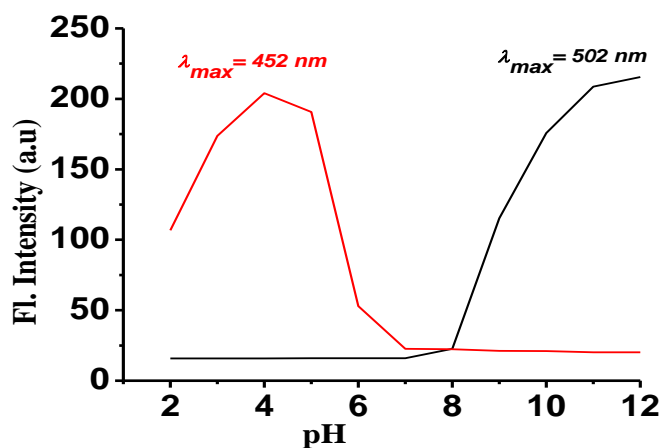

**Figure S2:** pH titration curve of ISH ( $C=1 \times 10^{-5} \text{ M}$ ) in fluorescence spectroscopy, pH is adjusted with  $HClO_4$  and  $NaOH$ .

### 3. Determination of fluorescence quantum yield:

Here, the quantum yield  $\phi$  was measured by using the following equation,

$$\phi_x = \phi_s (F_x / F_s)(A_s / A_x)(n_x^2 / n_s^2)$$

Where,

X & S indicate the unknown and standard solution respectively,  $\phi$  = quantum yield, F = area under the emission curve, A = absorbance at the excitation wave length, n = index of refraction of the solvent. Here  $\phi$  measurements were performed using anthracene in ethanol as standard [ $\phi = 0.27$ ] (error ~ 10%).

The quantum yield of **ISH** itself is 0.00328 which remarkably changed to 0.8296 (around 252 fold enhancements) on the formation of a complex with  $Al^{3+}$  metal ion and 0.4123 (around 125 fold enhancements) due to binding with PPI respectively.

#### 4. Determination of the association constants:

The spectra of these solutions were recorded by means of fluorescence methods. Binding constant was calculated according to the Benesi-Hildebrand equation.  $K_a$  was calculated following the equation stated below.

$$1/(F-F_0) = 1/\{K(F_{\max}-F_0) [Al^{3+}]_n\} + 1/[F_{\max}-F_0]$$

$$1/(F-F_0) = 1/\{K(F_{\max}-F_0) [P_2O_7^{4-}]_n\} + 1/[F_{\max}-F_0]$$

Here  $F_0$  is the fluorescence of receptor in the absence of guest, F is the fluorescence recorded in the presence of added guest,  $F_{\max}$  is fluorescence in presence of added  $[Al^{3+}]_{\max}$  and  $[P_2O_7^{4-}]_{\max}$ , K is the association constant ( $M^{-1}$ ). The association constant ( $K_a$ ) could be determined from the slope of the straight line of the plot of  $1/(F-F_0)$  against  $1/[Al^{3+}]_n$  and  $1/[P_2O_7^{4-}]_n$  respectively. The association constant ( $K_a$ ) as determined by fluorescence titration method for sensor with  $Al^{3+}$  and PPI is found to be  $1.08 \times 10^5 M^{-1}$  and  $9.7 \times 10^4 M^{-1}$  respectively.

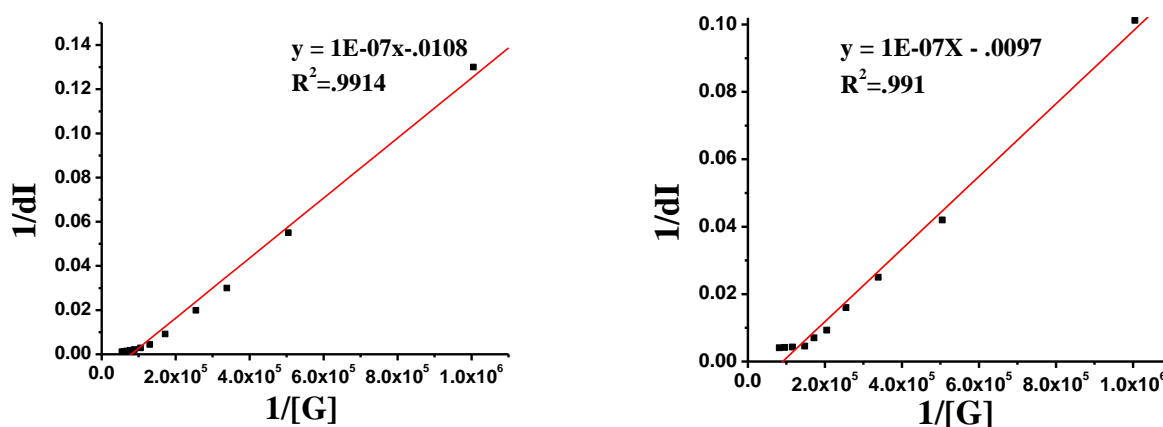

Figure S3: Benesi-Hildebrand plot.

**Determination of the association constant of ISH with Al<sup>3+</sup> by nonlinear least-squares analysis:**

The association constant  $K_{11}$  and  $K_{12}$  were determined by nonlinear least-squares analysis of  $Y$  versus  $c_M$  using the following equation<sup>1</sup>.

$$Y = \frac{Y_0 + c_M \Phi K_{11}[M] + Y_{lim} \beta_{21}[M]^2}{1 + K_{11}[M] + \beta_{21}[M]^2}$$

Where  $\beta_{21} = K_{11}K_{21}$ ,  $[M] \approx c_M$  is Al<sup>3+</sup> ion concentration,  $Y_0$  or  $Y$  is integrated emission in the absence or presence of Al<sup>3+</sup> ion,  $\Phi$  is the quantum yield of the sensor-Al<sup>3+</sup> complex in 1:1 stoichiometry.

**Table.** Association constants of ISH with Al<sup>3+</sup>

| Entry                  | $K_{11}/M^{-1}(10^4)$ | $K_{12}/M^{-1}(10^4)$ |
|------------------------|-----------------------|-----------------------|
| ISH / Al <sup>3+</sup> | 5.366                 | 17.653                |

**5. Calculation of the detection limit:**

The detection limit DL of **ISH** for Al(III) and PPI was determined from the following equation<sup>2</sup>:

$$DL = K * Sb1/S$$

Where  $K = 2$  or  $3$  (we take  $2$  in this case);  $Sb1$  is the standard deviation of the blank solution;  $S$  is the slope of the calibration curve.

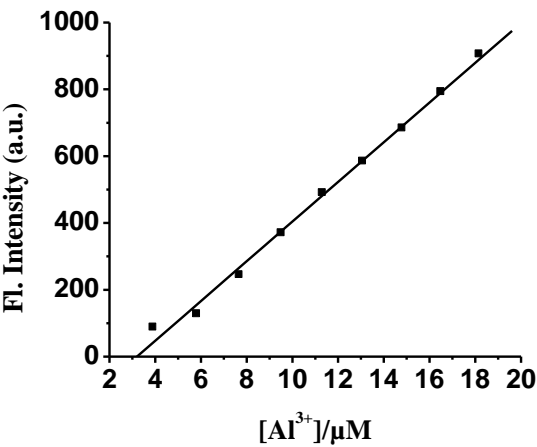

|   |            |          |
|---|------------|----------|
| A | -190.20355 | 20.10059 |
| B | 59.43123   | 1.65893  |

-----

| R       | SD       | N | P       |
|---------|----------|---|---------|
| 0.99728 | 22.90228 | 9 | <0.0001 |

**Figure S4:** Fl. Intensity vs. [Al<sup>3+</sup>] plot.

From the Fl. intensity vs. [Al<sup>3+</sup>] graph, we get slope = 59.43123, and Sb1 value is 22.90228. Thus using the formula, we get the Detection Limit = 0.77 μM i.e. ISH can detect Al<sup>3+</sup> ion in this minimum concentration.

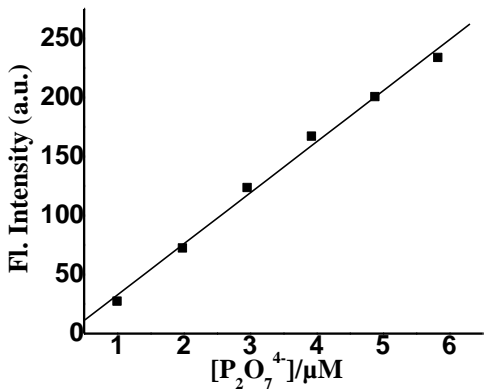

|   |           |         |
|---|-----------|---------|
| A | -10.51144 | 6.57914 |
| B | 43.22648  | 1.73021 |

---

| R       | SD      | N | P       |
|---------|---------|---|---------|
| 0.99681 | 6.99218 | 6 | <0.0001 |

**Figure S5:** Fl. Intensity vs. [PPi] plot.

From the Fl. Intensity vs. [P<sub>2</sub>O<sub>7</sub><sup>4-</sup>] graph we get slope = 43.226, and Sb1 value is 45.572. Thus using the formula we get the Detection Limit = 1.71 μM i.e. ISH can detect P<sub>2</sub>O<sub>7</sub><sup>4-</sup> ion in this minimum concentration.

## 6. $^1\text{H}$ NMR, $^{13}\text{C}$ NMR and ESI MS spectra:

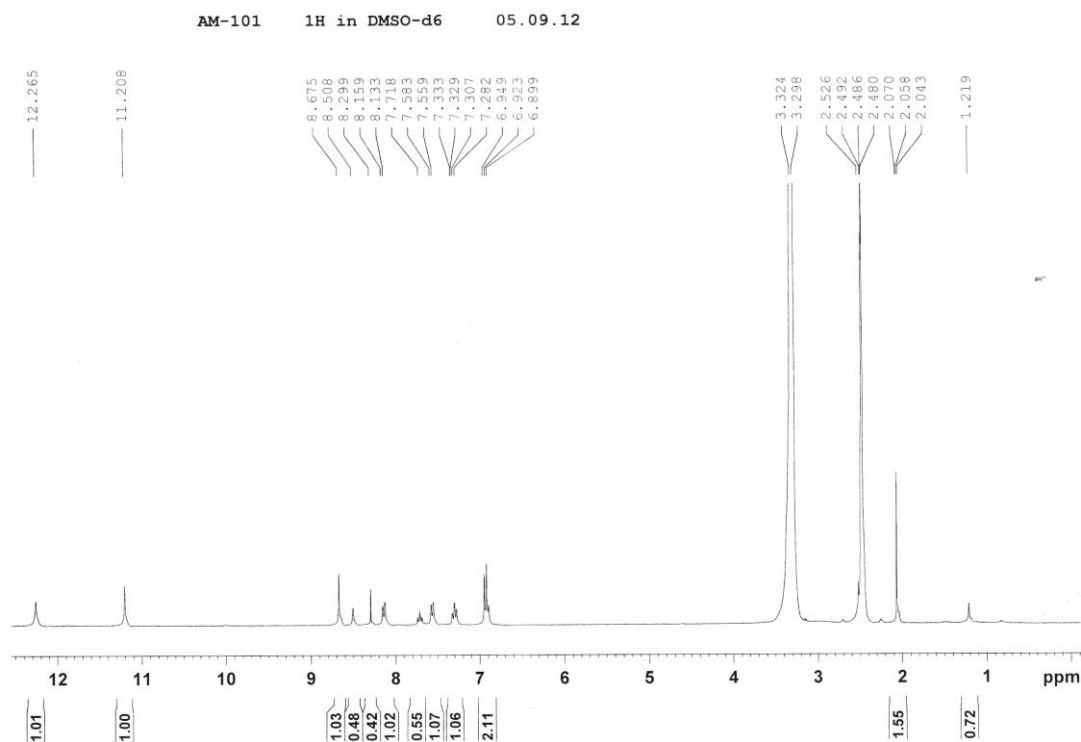

Figure S6:  $^1\text{H}$ -NMR spectra of ISH.

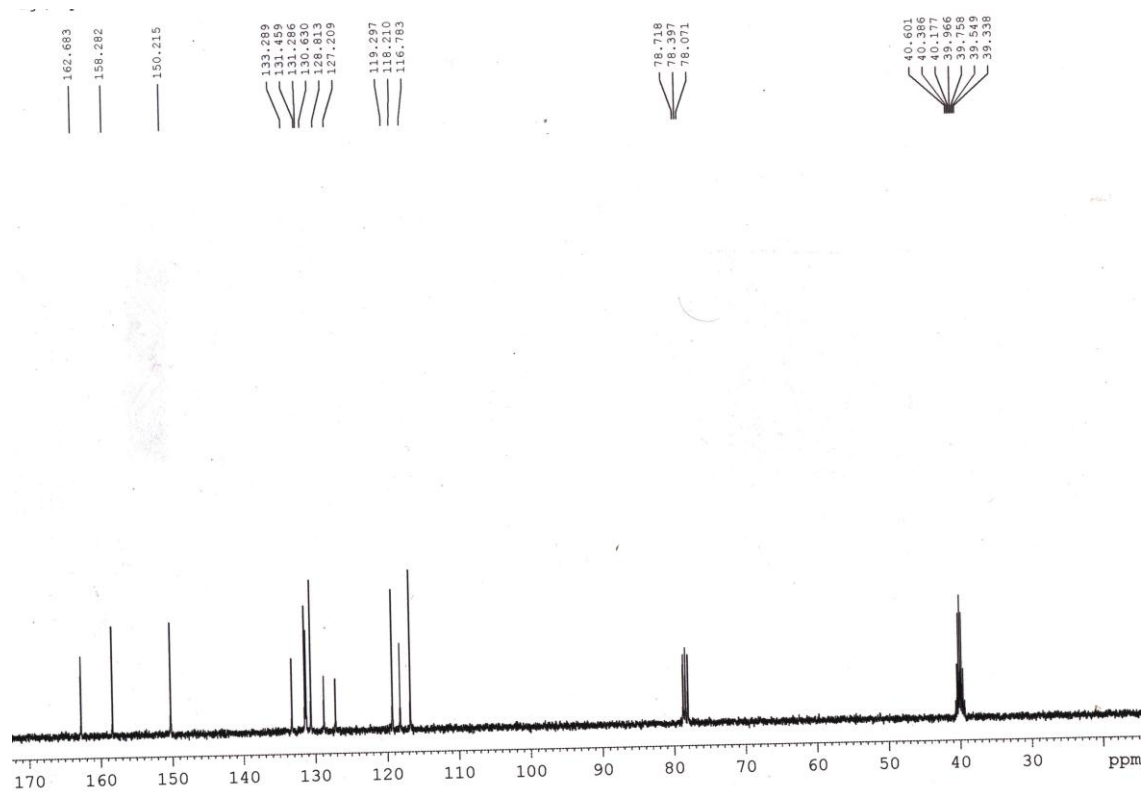

Figure S7:  $^{13}\text{C}$ -NMR spectra of ISH.

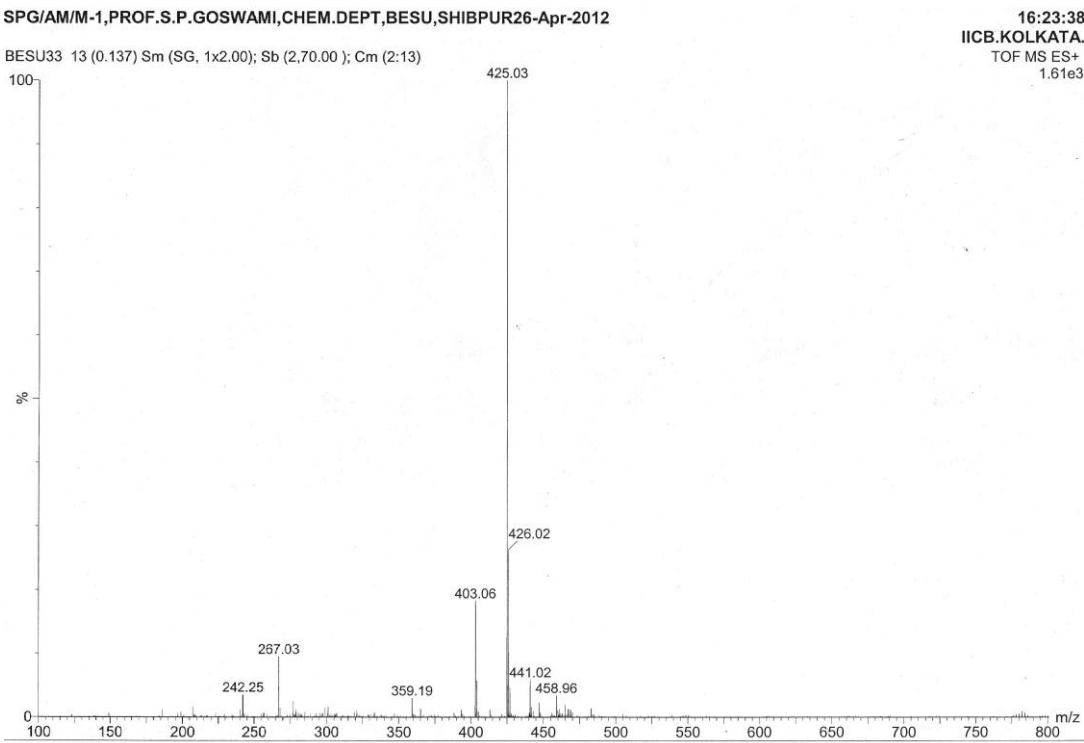

Figure S8: ESI-MS spectra of ISH.

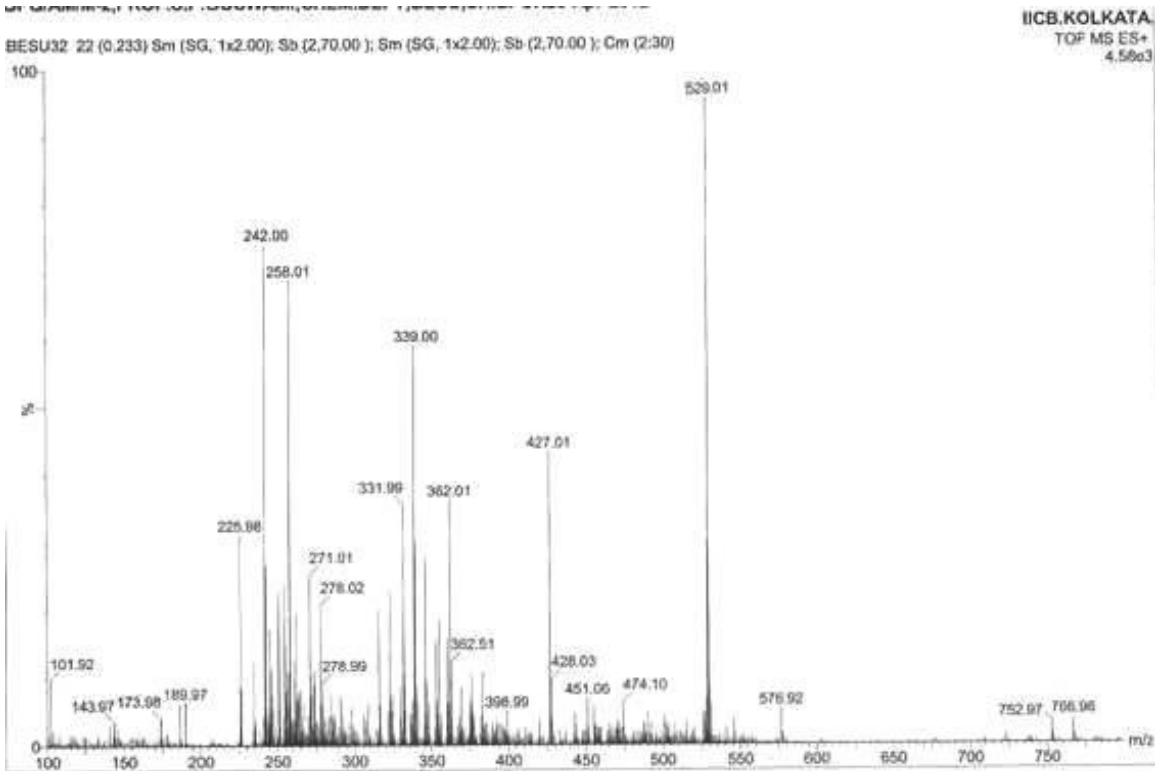

**Figure S9:** ESI-MS spectra of ISH-Al<sup>3+</sup> complex.

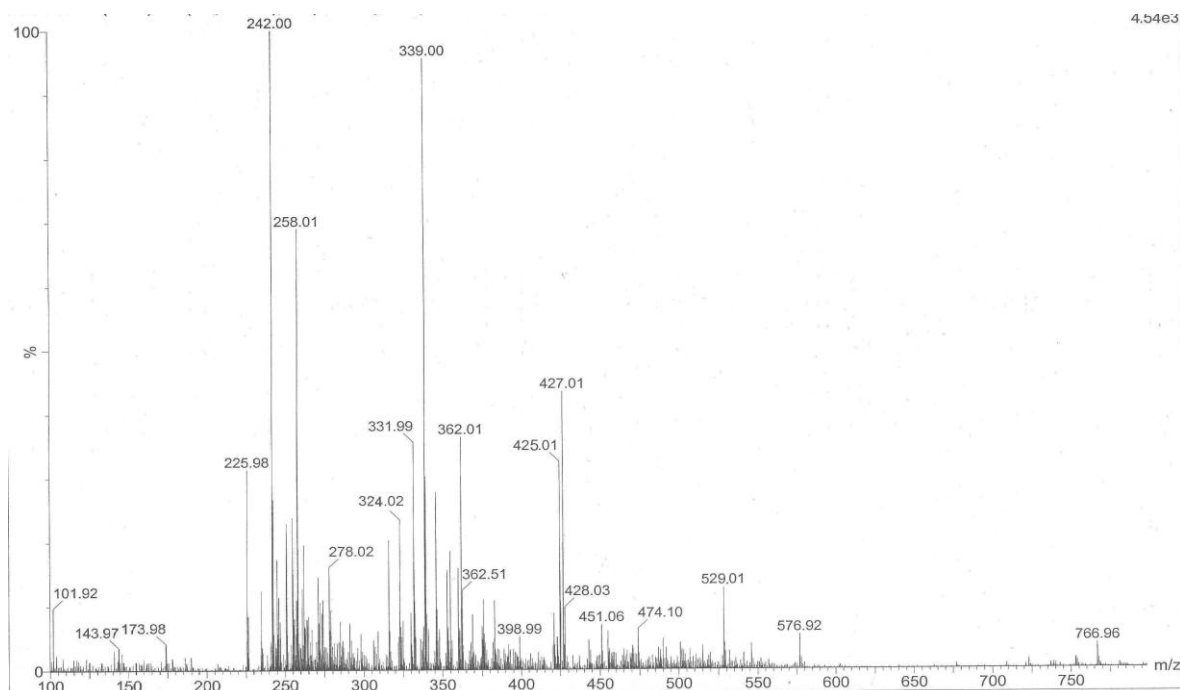

**Figure S10:** ESI-MS spectra of PPI added ISH-Al<sup>3+</sup> complex.

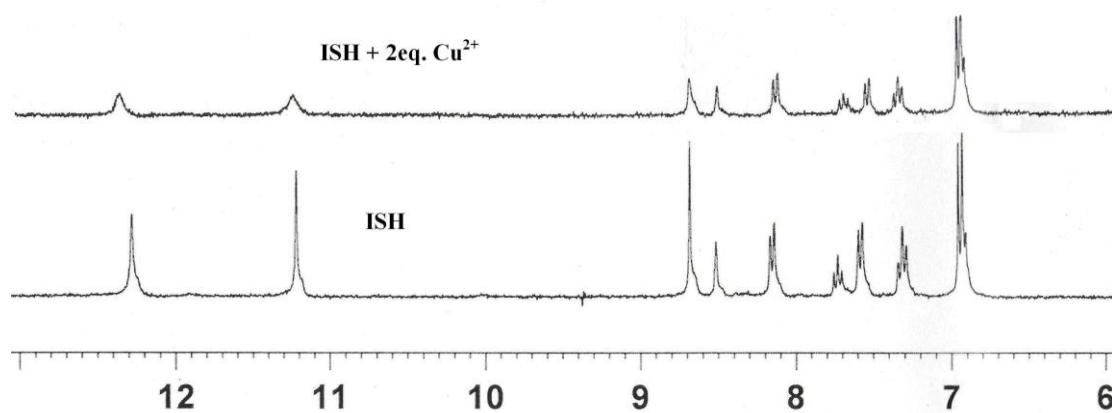

**Figure S11:** Partial <sup>1</sup>H-NMR spectra of ISH with addition of 2eq. Cu<sup>2+</sup> in d<sub>6</sub>-DMSO.

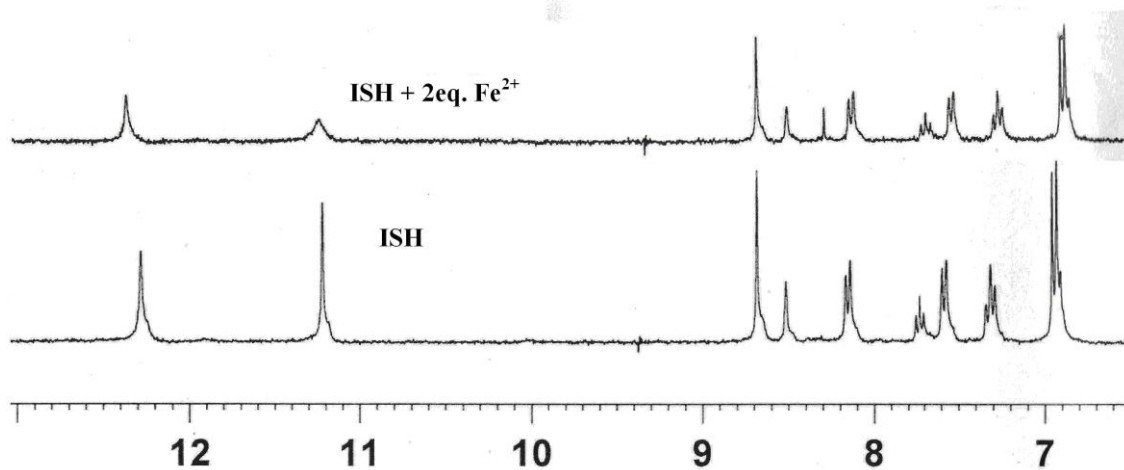

**Figure S12:** Partial <sup>1</sup>H-NMR spectra of ISH with addition of 2eq. Fe<sup>2+</sup> in d<sub>6</sub>-DMSO.

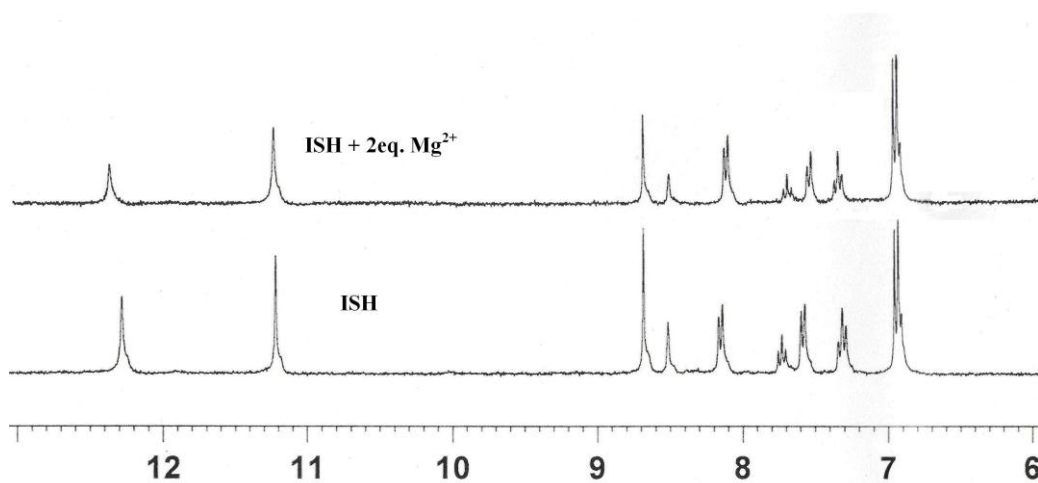

**Figure S13:** Partial <sup>1</sup>H-NMR spectra of ISH with addition of 2eq. Mg<sup>2+</sup> in d<sub>6</sub>-DMSO.

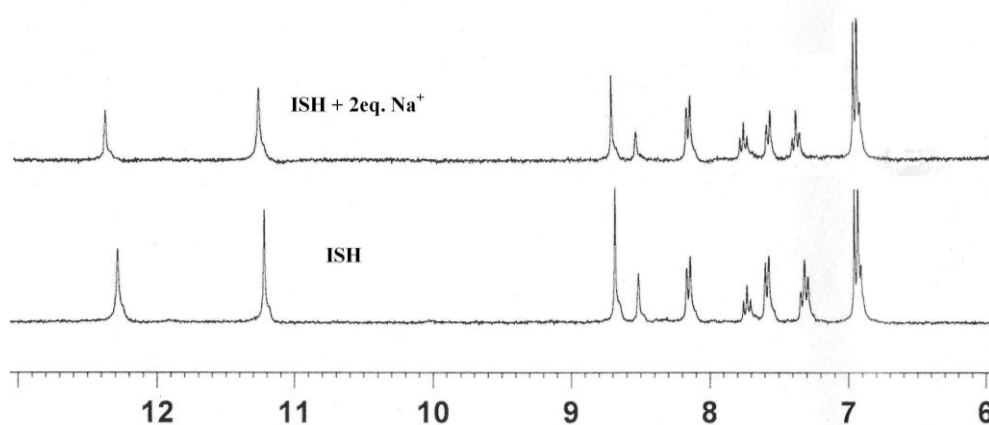

**Figure S14:** Partial <sup>1</sup>H-NMR spectra of ISH with addition of 2eq. Na<sup>+</sup> in d<sub>6</sub>-DMSO.

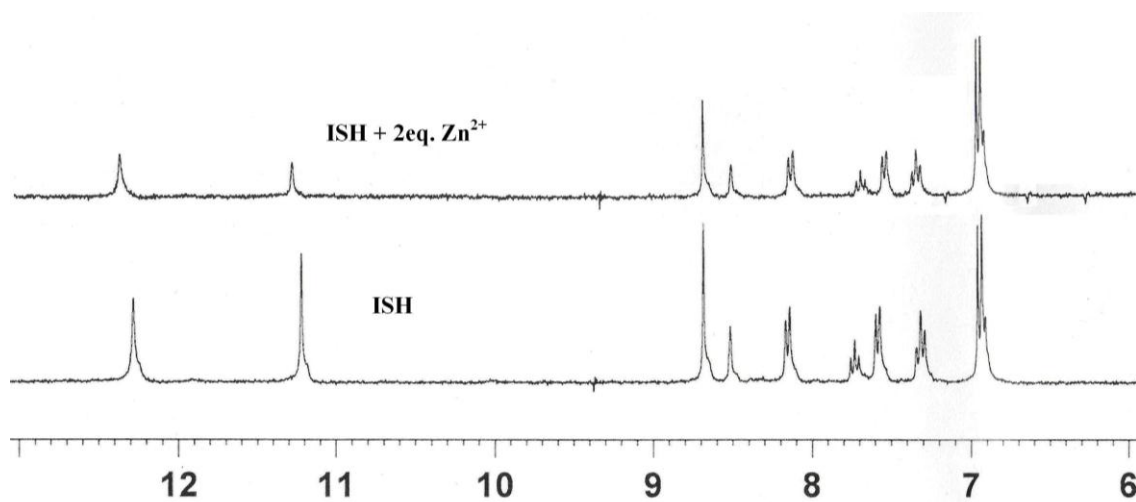

**Figure S15:** Partial <sup>1</sup>H-NMR spectra of ISH with addition of 2eq. Zn<sup>2+</sup> in *d*<sub>6</sub>-DMSO.

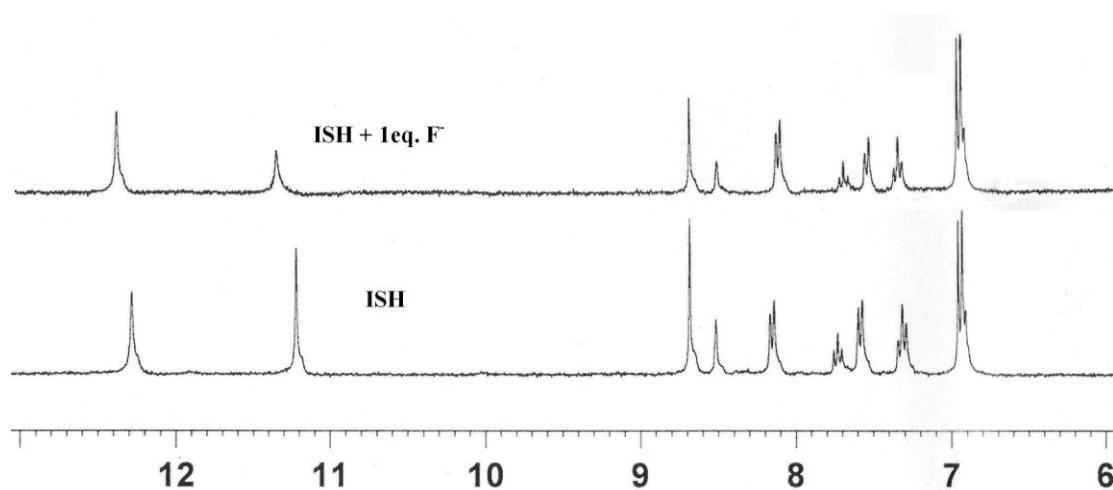

**Figure S16:** Partial <sup>1</sup>H-NMR spectra of ISH with addition of 1eq. F<sup>-</sup> in *d*<sub>6</sub>-DMSO.

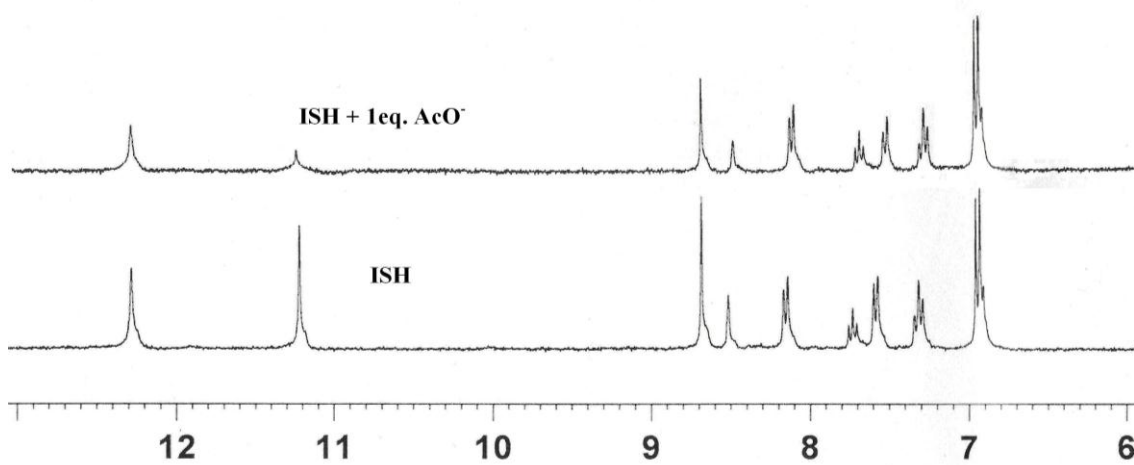

**Figure S17:** Partial <sup>1</sup>H-NMR spectra of ISH with addition of 1eq. AcO<sup>-</sup> in *d*<sub>6</sub>-DMSO.

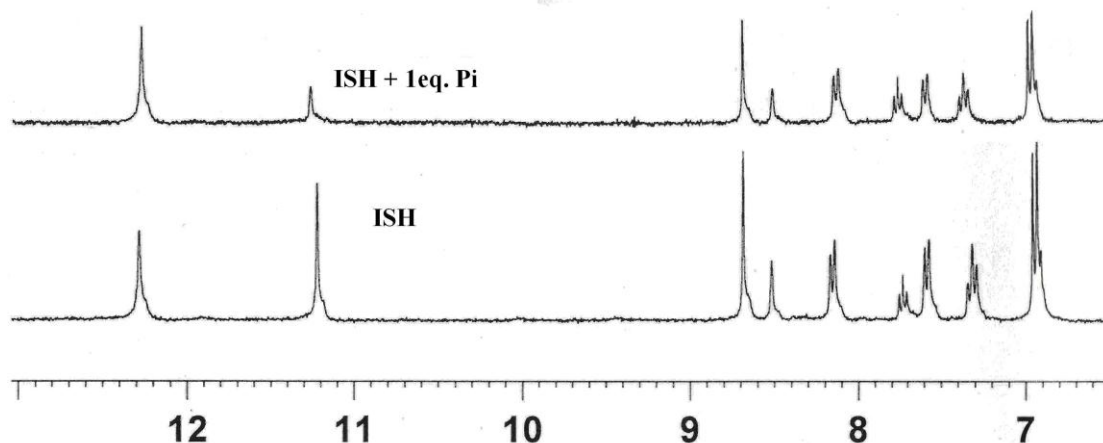

**Figure S18:** Partial  $^1\text{H}$ -NMR spectra of ISH with addition of 1eq. Pi in  $\text{d}_6$ -DMSO.

**7. Cyclic Voltammogram of ISH with addition of 2 equiv.  $\text{Al(III)}$  and then 2 equiv. PPi.**

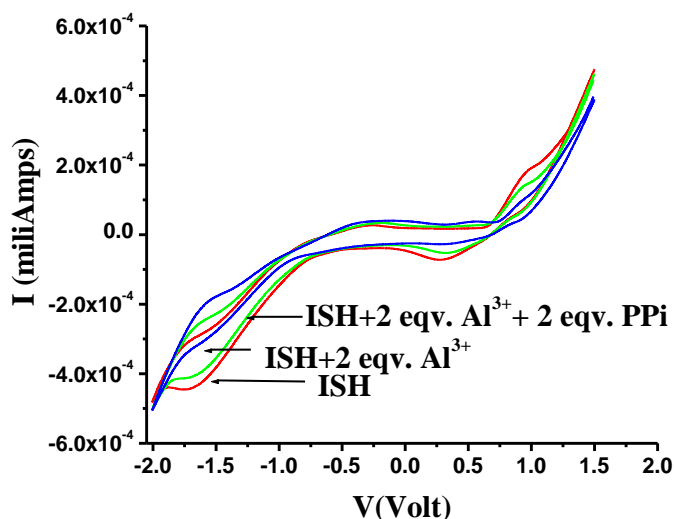

**Figure S19:** Cyclic Voltammogram of ISH with addition of  $\text{Al(III)}$  and PPi using  $\text{Hg/HgCl}_2$  electrode in  $\text{MeOH/H}_2\text{O}$  as a solvent.

**8. Fluorescence emission spectra of ISH ( $C = 1 \times 10^{-5} \text{ M}$ , in  $\text{MeOH} : \text{H}_2\text{O}$  (1:1, v/v) at pH 7.5) with different cations as  $\text{Na}^+$ ,  $\text{K}^+$ ,  $\text{Ba}^{2+}$ ,  $\text{Ga}^{3+}$ ,  $\text{Mg}^{2+}$ ,  $\text{Ca}^{2+}$ ,  $\text{Mn}^{2+}$ ,  $\text{Fe}^{2+}$ ,  $\text{Ni}^{2+}$ ,  $\text{Co}^{2+}$ ,  $\text{Zn}^{2+}$ ,  $\text{Cu}^{2+}$ ,  $\text{Ag}^+$ ,  $\text{Cd}^{2+}$ ,  $\text{Hg}^{2+}$ ,  $\text{Pb}^{2+}$ ,  $\text{In}^{3+}$ ,  $\text{Cr}^{3+}$  and  $\text{Fe}^{3+}$  in  $\text{MeOH} : \text{H}_2\text{O}$  ( $C = 2 \times 10^{-4} \text{ M}$ , 1:1, v/v). The solutions of metal ions were prepared from  $\text{NaClO}_4$ ,  $\text{KClO}_4$ ,  $\text{Ba}(\text{ClO}_4)_2 \cdot 4\text{H}_2\text{O}$ ,  $\text{GaCl}_3$ ,  $\text{Mg}(\text{ClO}_4)_2 \cdot 6\text{H}_2\text{O}$ ,  $\text{Ca}(\text{ClO}_4)_2 \cdot 4\text{H}_2\text{O}$ ,  $\text{Mn}(\text{ClO}_4)_2 \cdot 6\text{H}_2\text{O}$ ,  $\text{Fe}(\text{SO}_4)_2$ ,  $\text{Ni}(\text{ClO}_4)_2 \cdot 6\text{H}_2\text{O}$ ,  $\text{Co}(\text{ClO}_4)_2 \cdot 6\text{H}_2\text{O}$ ,  $\text{Zn}(\text{ClO}_4)_2 \cdot 6\text{H}_2\text{O}$ ,  $\text{Cu}(\text{ClO}_4)_2 \cdot 6\text{H}_2\text{O}$ ,  $\text{AgNO}_3$ ,  $\text{Cd}(\text{ClO}_4)_2 \cdot \text{H}_2\text{O}$ ,  $\text{HgCl}_2$ ,  $\text{Pb}(\text{ClO}_4)_2$ ,  $\text{InCl}_3$ ,  $\text{CrCl}_3 \cdot 6\text{H}_2\text{O}$  and  $\text{FeCl}_3$  respectively in  $\text{MeOH-H}_2\text{O}$  (1:1, v/v).**

(a)

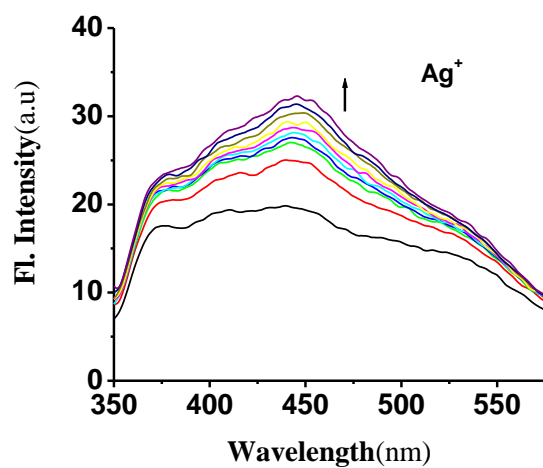

(b)

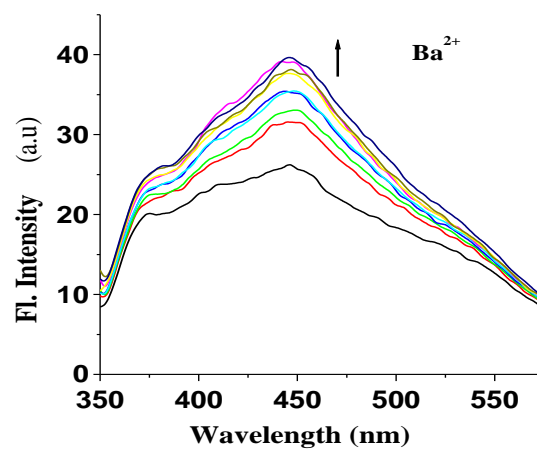

(c)

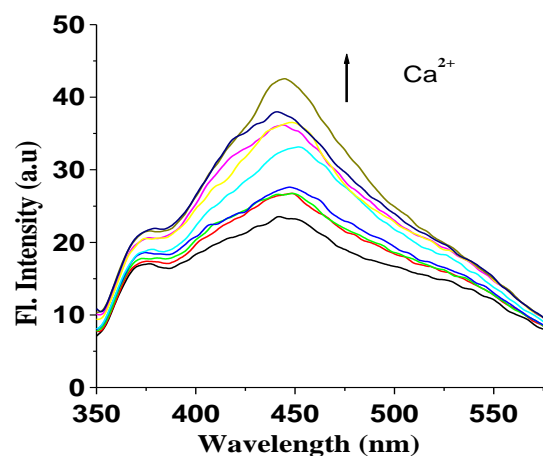

(d)

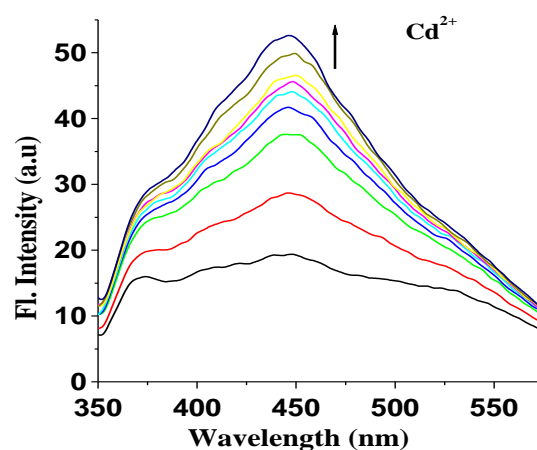

(e)

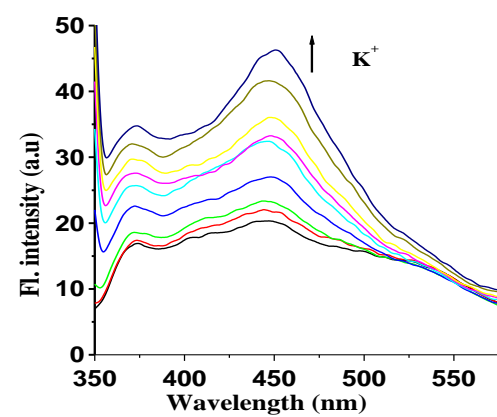

(f)

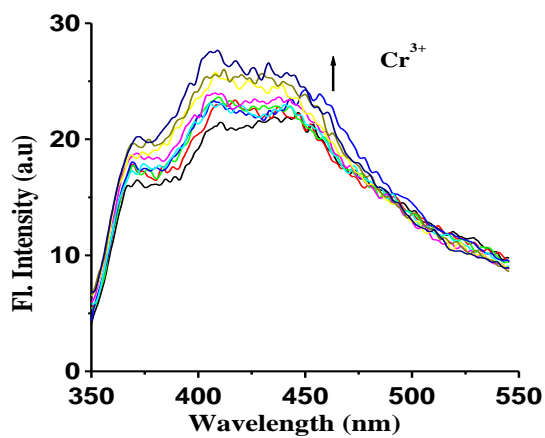

(g)

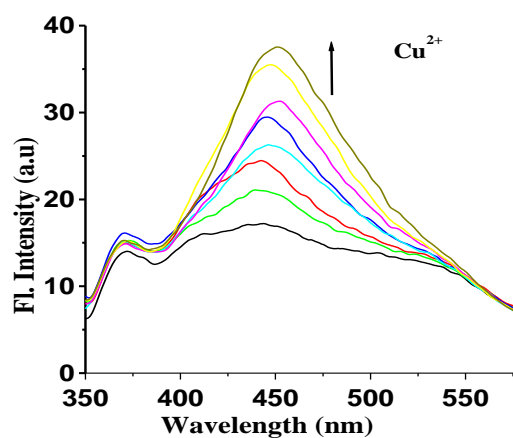

(h)

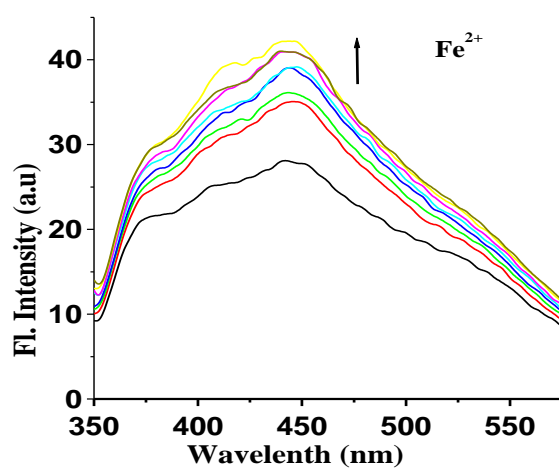

(i)

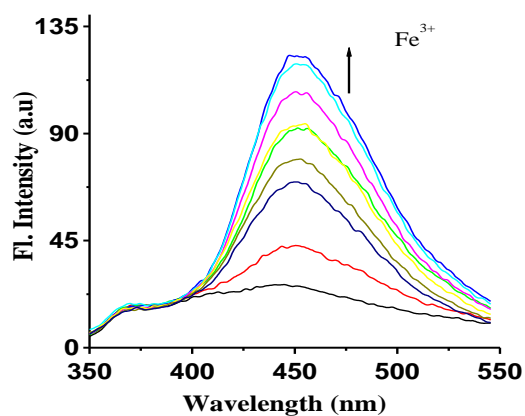

(j)

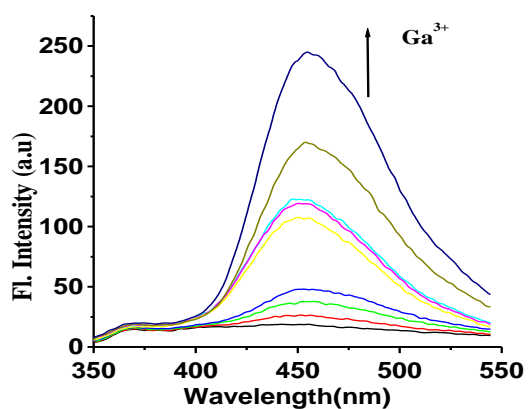

(k)

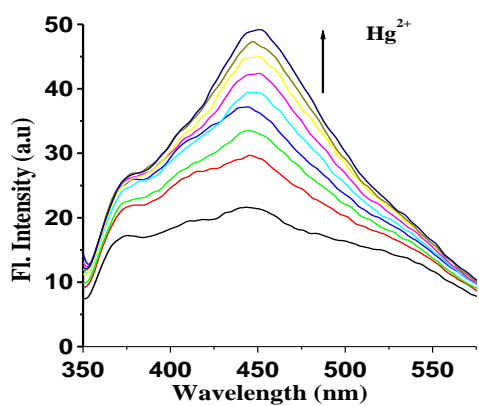

(l)

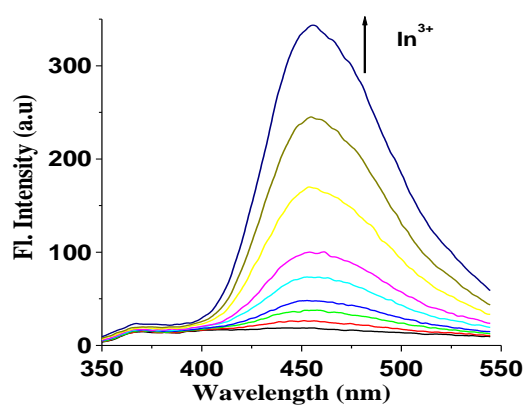

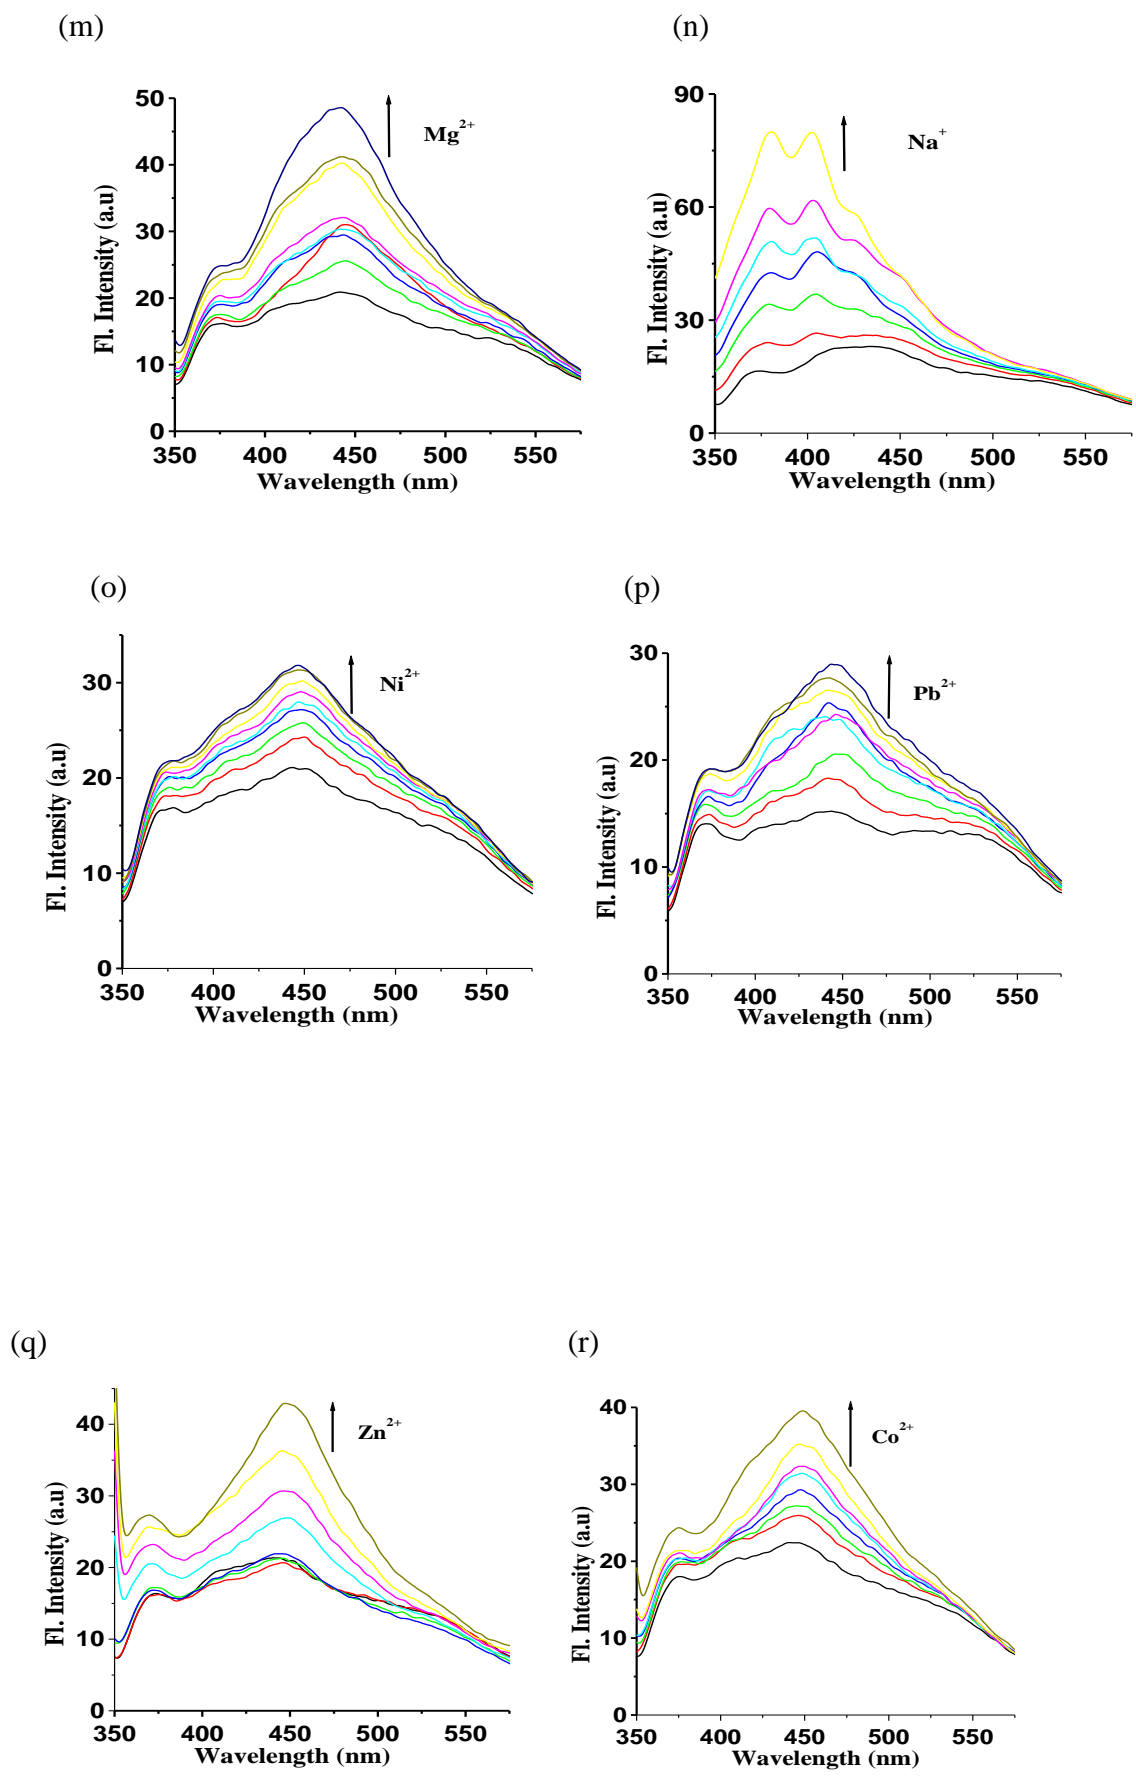

(s)

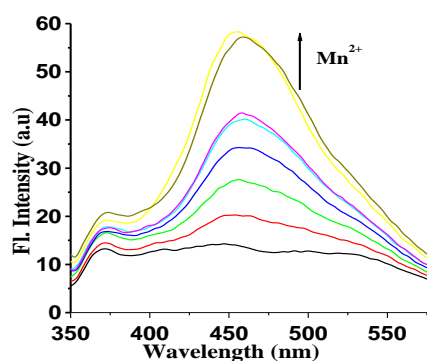

**9. Fluorescence emission spectra of ISH ( $C = 1 \times 10^{-5}$  M, in MeOH : H<sub>2</sub>O (1:1, v/v) at pH 7.5) with different anions as  $AcO^-$ ,  $Cl^-$ ,  $Br^-$ ,  $I^-$ ,  $F^-$ ,  $BzO^-$ ,  $SH^-$ ,  $H_2PO_4^-$ ,  $PO_4^{3-}$ ,  $S^{2-}$ ,  $N_3^-$ , ATP and ADP in MeOH : H<sub>2</sub>O ( $C = 2 \times 10^{-4}$  M). The  $AcO^-$ ,  $Cl^-$ ,  $Br^-$ ,  $I^-$ ,  $F^-$  and  $BzO^-$  as their tetra butyl salts;  $SH^-$ ,  $H_2PO_4^-$ ,  $PO_4^{3-}$ ,  $S^{2-}$ ,  $N_3^-$ ,  $P_2O_7^{4-}$  and  $SCN^-$  as their sodium salts; ATP and ADP as their potassium salts in MeOH : H<sub>2</sub>O solution (1:1, v/v).**

(a)

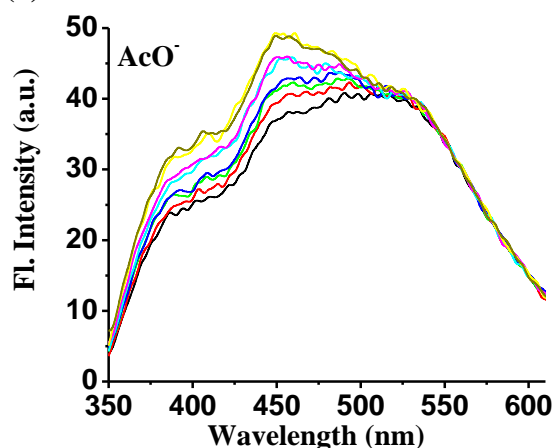

(b)

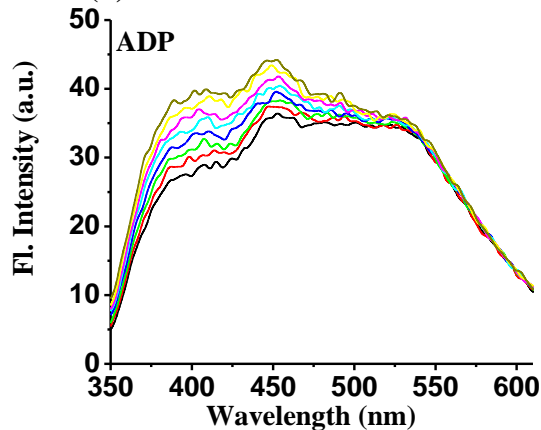

(c)

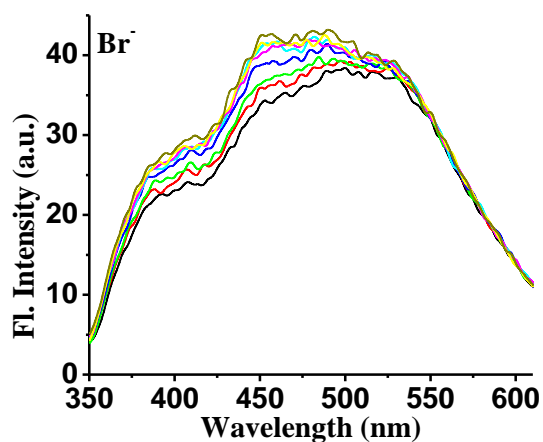

(d)

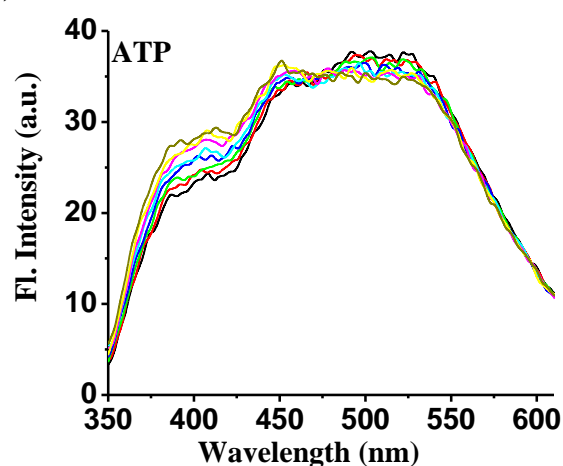

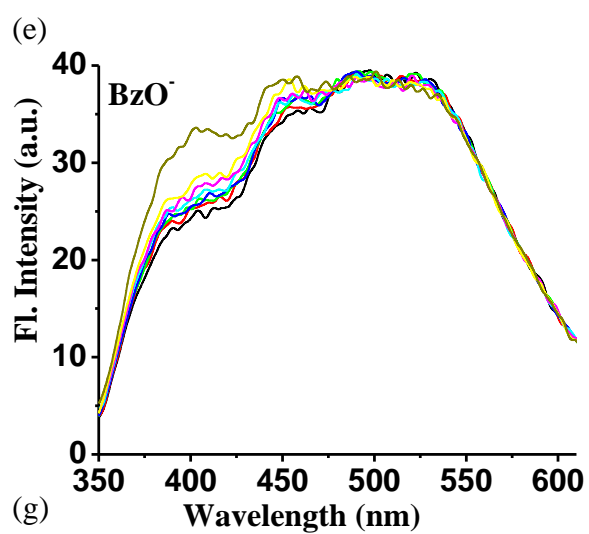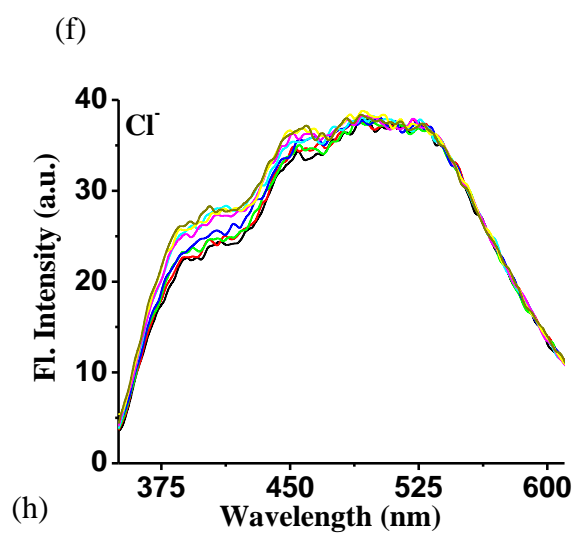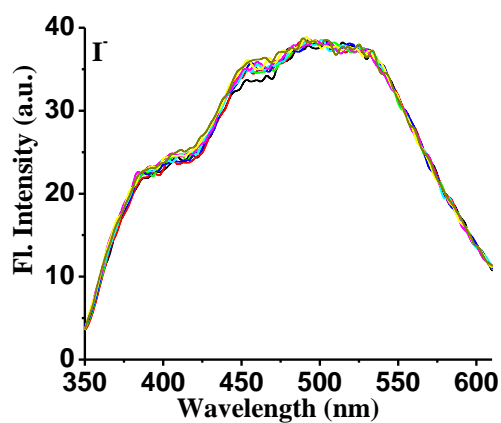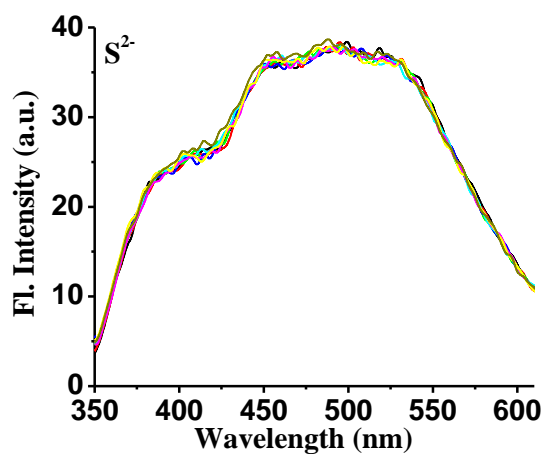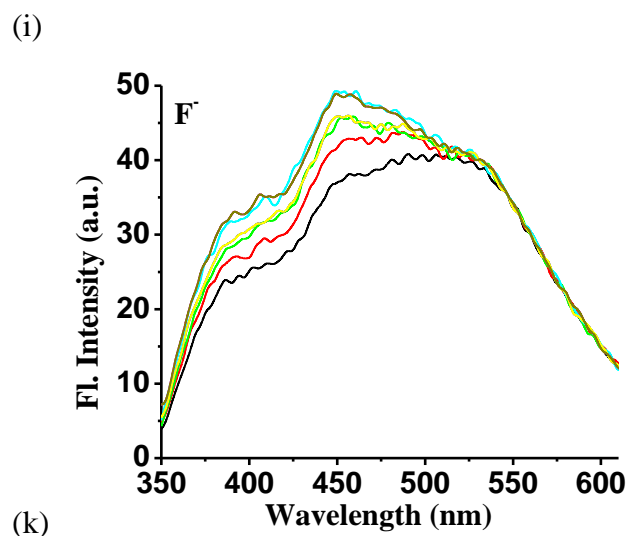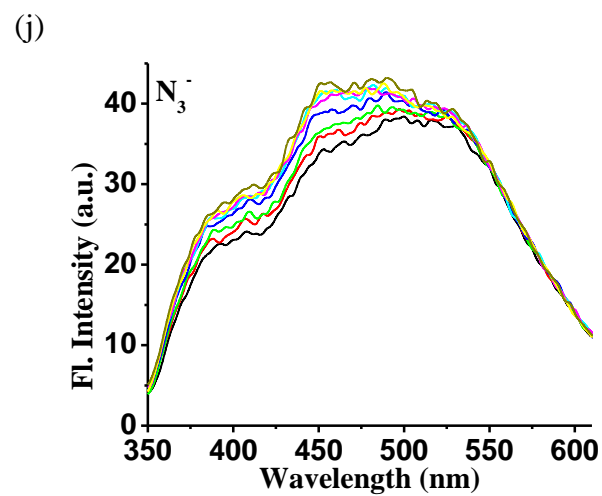

(k)

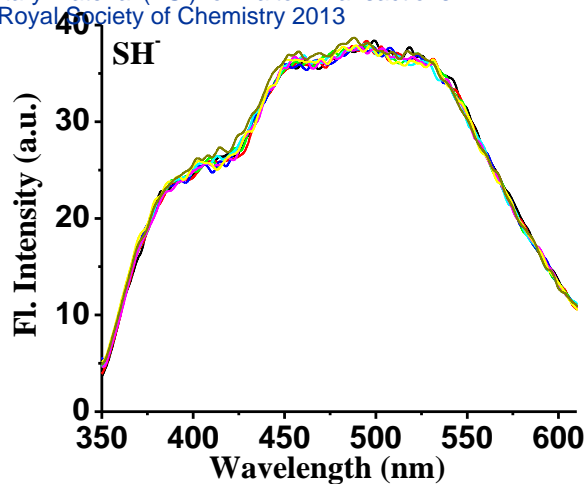

(I)

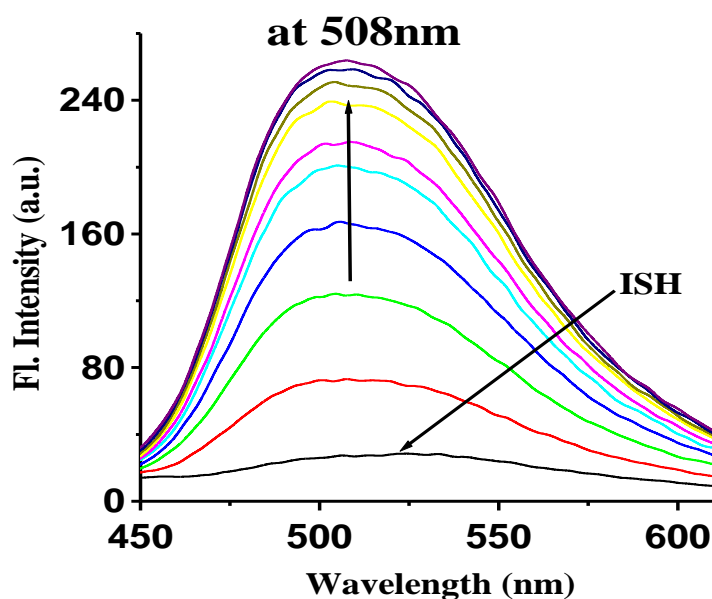

10. UV-vis titration spectra of receptor(ISH) with Al(III):

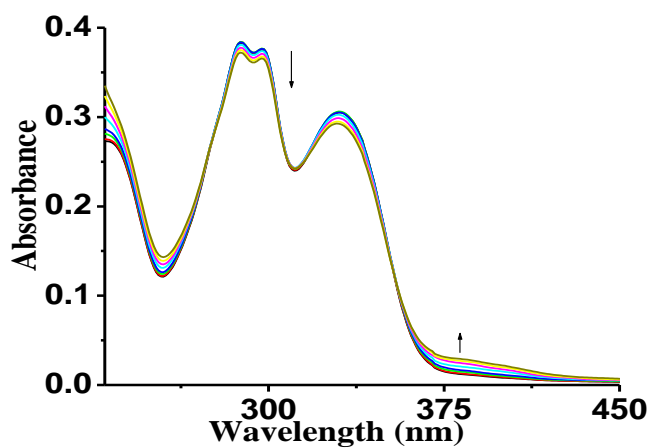

**Figure S20:** UV-Vis. titration spectra of ISH ( $c = 1.0 \times 10^{-5}$  M) in presence of  $\text{Al}^{3+}$  ( $c = 2.0 \times 10^{-4}$  M) at pH 7.5 in MeOH:H<sub>2</sub>O = 1:1 (v/v).

**11. FT-IR data of Receptor (above) and its complex with  $\text{Al}^{3+}$  ion (below):**

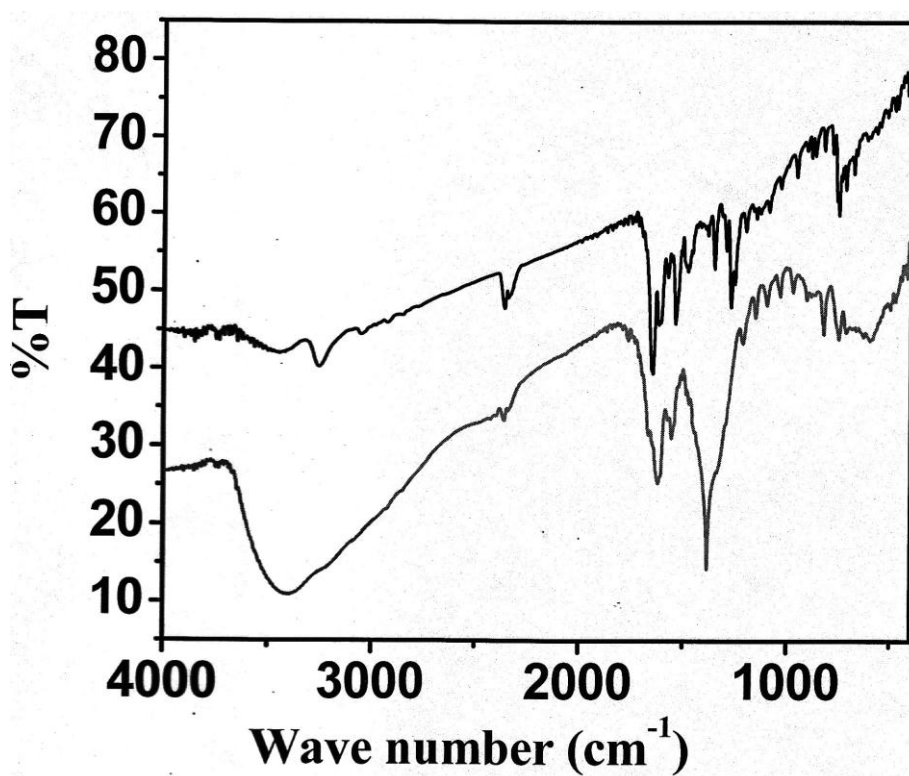

**Figure S21:** FT-IR spectra of ISH and its Al- complex.

**12. References:**

1. Valeur, B. *Molecular Fluorescence: Principles and Applications*. Wiley-VCH: Weinheim, 2002.
2. Zhu, M.; Yuan, M.; Liu, X.; Xu, J.; Lv, J.; Huang, C.; Liu, H.; Li, Y.; Wang, S.; Zhu, D. *Org. Lett.* 2008, *10*, 1481-1484.
